# Supplementary material
Source: MDPI journal article supplement (https://www.mdpi.com/2079-6412/12/7/932)
Supplement: s1 [file s1 › coatings-1782714-supplementary-final.pdf]

# Supplementary Materials: 3-(N,N-Diphenylamino)carbazole Donor Containing Bipolar Derivatives with Very High Glass Transition Temperatures as Potential TADF Emitters for OLEDs

Daiva Tavgeniene <sup>1</sup>, Raminta Beresneviute <sup>1</sup>, Dovydas Blazevicius <sup>1</sup>, Gintare Krucaite <sup>1</sup>, Greta Jacunskaitė <sup>1</sup>, Sujith Sudheendran Swayamprabha <sup>2</sup>, Jwo-Huei Jou <sup>2,\*</sup> and Saulius Grigalevicius <sup>1,\*</sup>

<sup>1</sup> Department of Polymer Chemistry and Technology, Kaunas University of Technology, Radvilenu Plentas 19, LT 50254 Kaunas, Lithuania; daiva.tavgeniene@ktu.lt (D.T.); raminta.beresneviute@ktu.lt (R.B.); dovydas.blazevicius@ktu.lt (D.B.); gintare.krucaite@ktu.lt (G.K.); jacugreta@gmail.com (G.J.)

<sup>2</sup> Department of Materials Science and Engineering, National Tsing-Hua University, No. 101, Kaungfu Rd., Hsin-Chu 30013, Taiwan; sujithsudheendran.s.s@gmail.com

\* Correspondence: jjou@mx.nthu.edu.tw (J.-H.J.); saulius.grigalevicius@ktu.lt (S.G.)

## Instrumentation

NMR spectra were recorded using a Bruker DPX 250 apparatus (Bruker, Billerica, MA, USA). Mass spectra were obtained on a Varian MAT-312-Spectrometer Waters ZQ 200 spectro-chromatograph (Bruker). Fourier transform infrared (FTIR) spectra were measured using a Bio-Rad Digilab FTS-40 spectrometer (Bruker).

Ultraviolet (UV) spectra were measured with a Shimadzu UV-1601PC spectrophotometer (Bruker).

Fluorescence (FL) spectra were recorded with a charge-coupled-device (CCD) Aminco-Bowman Series 2 spectrograph (Bruker).

Differential scanning calorimetry (DSC) measurements were carried out using a TA Instrument DSC-2920 low-temperature scanning calorimeter (TA Instruments, Alzenau, Germany).

Thermogravimetric analysis (TGA) was performed on a TA Instrument 2950 TGA thermal analyzer (TA Instruments). The TGA and DSC measurements were recorded in a nitrogen atmosphere at a heating rate of 10 °C/min.

**Citation:** Tavgeniene, D.; Beresneviute, R.; Blazevicius, D.; Krucaite, G.; Jacunskaitė, G.; Sudheendran Swayamprabha, S.; Jou, J.-H.; Grigalevicius, S. 3-(N,N-Diphenylamino)carbazole Donor Containing Bipolar Derivatives with very High Glass Transition Temperatures as Potential TADF Emitters for OLEDs. *Coatings* **2022**, *12*, 932. <https://doi.org/10.3390/coatings12070932>

Academic Editor: Chen Tei-Chen

Received: 6 June 2022

Accepted: 29 June 2022

Published: 1 July 2022

**Publisher's Note:** MDPI stays neutral with regard to jurisdictional claims in published maps and institutional affiliations.

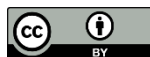

**Copyright:** © 2022 by the authors. Submitted for possible open access publication under the terms and conditions of the Creative Commons Attribution (CC BY) license (<https://creativecommons.org/licenses/by/4.0/>).

**Table S1.** Photophysical, thermal, and electrochemical characteristics of the objective derivatives 6–8.

| Material | $\lambda_{\text{abs}}^{\text{a}}$<br>(nm) | $\lambda_{\text{PL}}^{\text{b}}$<br>(nm) | $\lambda_{\text{PL}}^{\text{c}}$<br>(nm) | $T_{\text{g}}^{\text{d}}$<br>(°C) | $T_{\text{d}}^{\text{e}}$<br>(°C) | HOMO/LUMO <sup>f</sup><br>(-eV) |
|----------|-------------------------------------------|------------------------------------------|------------------------------------------|-----------------------------------|-----------------------------------|---------------------------------|
| 6        | 360                                       | 466                                      | 472                                      | 173                               | 389                               | 5.62/2.91                       |
| 7        | 370                                       | 421                                      | 460                                      | 111                               | 351                               | 5.61/2.95                       |
| 8        | 345                                       | 545                                      | 549                                      | 159                               | 398                               | 5.58/2.79                       |

<sup>a</sup> Absorbance peaks; <sup>b</sup> Photoluminescence (PL) spectra peak measured at room temperature from toluene solution; <sup>c</sup> Photoluminescence (PL) spectra peak measured at room temperature from thin film; <sup>d</sup> Glass transition temperature; <sup>e</sup> Decomposition temperature; <sup>f</sup> the redox potential obtained using a cyclic voltammetry (CV) technique gives HOMO and LUMO. The potential to semi-oxidation ( $E_{1/2^{\text{ox}}}$ ) from  $(E_{\text{p1}} + E_{\text{p2}})/2 - 0.48$  has been computed, where 0.48 is correctly estimated as the value of ferrocenium/ferrocene ( $\text{Fc}^+/\text{Fc}$ ) has been included in the internal standard. Then the energy from the HOMO =  $-(E_{1/2^{\text{ox}}} + 4.8)$  was found. The LUMO energy level was calculated by removing the gap from HOMO, [ $E_{\text{LUMO}} = -E_{\text{HOMO}} + E_{\text{g}}$ ].

**Table S2.** Summarized electroluminescent properties of the described OLEDs.

| Dopant | Dopant<br>(wt%) | PE <sub>100</sub> /CE <sub>100</sub> /EQE <sub>100</sub><br>(lm W <sup>-1</sup> /cd A <sup>-1</sup> /%) | PE <sub>1000</sub> /CE <sub>1000</sub> /EQE <sub>1000</sub><br>(lm W <sup>-1</sup> /cd A <sup>-1</sup> /%) | CIE <sub>xy</sub><br>Coordinates | Max. Lum.<br>(cd m <sup>-2</sup> ) |
|--------|-----------------|---------------------------------------------------------------------------------------------------------|------------------------------------------------------------------------------------------------------------|----------------------------------|------------------------------------|
| 6      | 5               | 1.6/2.5/1.5                                                                                             | 0.3/0.7/0.4                                                                                                | (0.17, 0.24)                     | 3160                               |
|        | 10              | 1.7/2.8/1.6                                                                                             | 1.0/2.4/1.4                                                                                                | (0.18, 0.25)                     | 2598                               |
|        | 15              | 2.2/3.2/1.7                                                                                             | 1.2/2.5/1.4                                                                                                | (0.18, 0.27)                     | 2632                               |
|        | 20              | 2.2/3.2/1.6                                                                                             | 1.2/2.4/1.3                                                                                                | (0.18, 0.28)                     | 2442                               |
| 7      | 5               | 1.2/1.9/1.3                                                                                             | 0.3/0.7/-                                                                                                  | (0.17, 0.21)                     | 1005                               |
|        | 10              | 0.5/1.0/0.6                                                                                             | -/-/-                                                                                                      | (0.18, 0.23)                     | 825                                |
|        | 15              | 1.1/1.9/1.1                                                                                             | -/-/-                                                                                                      | (0.18, 0.24)                     | 926                                |

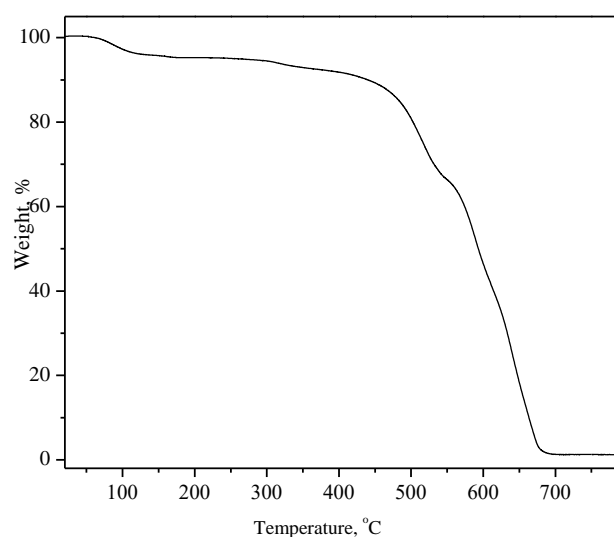**Figure S1.** TGA curve of compound 6. Heating rate: 10 °C min<sup>-1</sup>.

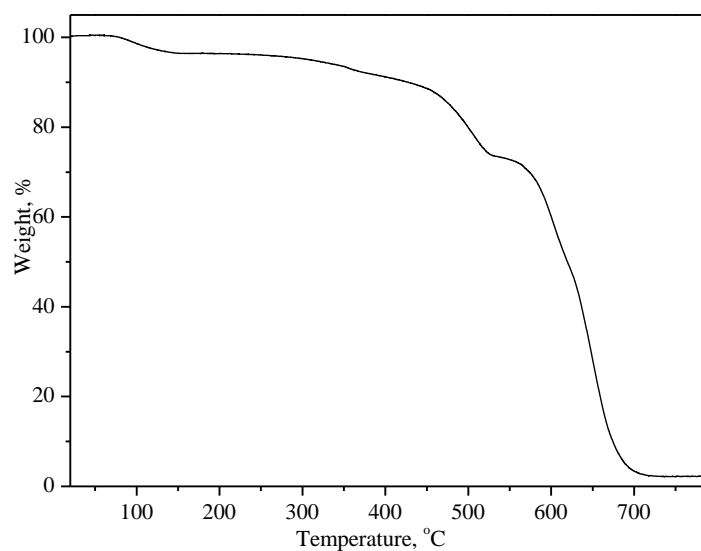

**Figure S2.** TGA curve of compound 8. Heating rate: 10 °C min<sup>-1</sup>.

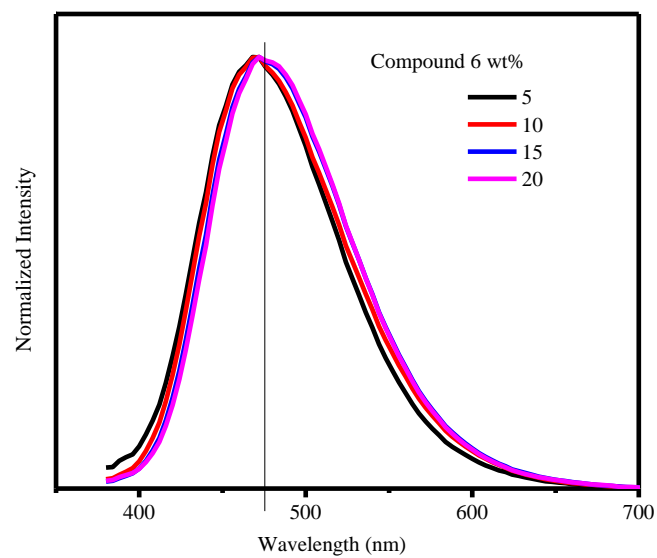

**Figure S3.** Emission spectra of OLEDs using emitter 6 in CBP host.
